# Supplementary material for: Optimized synthesis of polyacrylic acid-coated magnetic nanoparticles for high-efficiency DNA isolation and size selection
Source: Royal Society of Chemistry journal article supplement (doi:10.1039/d3ra04687g), 2023-01-01
Supplement: d3ra04687g1.pdf [file d3ra04687g1.pdf]

## SUPPORTING INFORMATION

### Optimized Synthesis of Polyacrylic acid-coated Magnetic Nanoparticles for High-efficiency DNA Isolation and Size Selection

Nesrine Bali,<sup>a</sup> Svein J. Brennhaug,<sup>a</sup> Magnar Bjørnas,<sup>\*b,c</sup> Sulalit Bandyopadhyay,<sup>\*\*a</sup> Adeel Manaf<sup>\*#b</sup>

<sup>a</sup> Particle Engineering Centre, Department of Chemical Engineering, NTNU, Trondheim, Norway.

<sup>b</sup> Department of Clinical and Molecular Medicine, NTNU, Trondheim, Norway.

<sup>c</sup> Department of Microbiology, Oslo University Hospital, Oslo, Norway.

# These authors contributed equally to this work

\* Corresponding authors

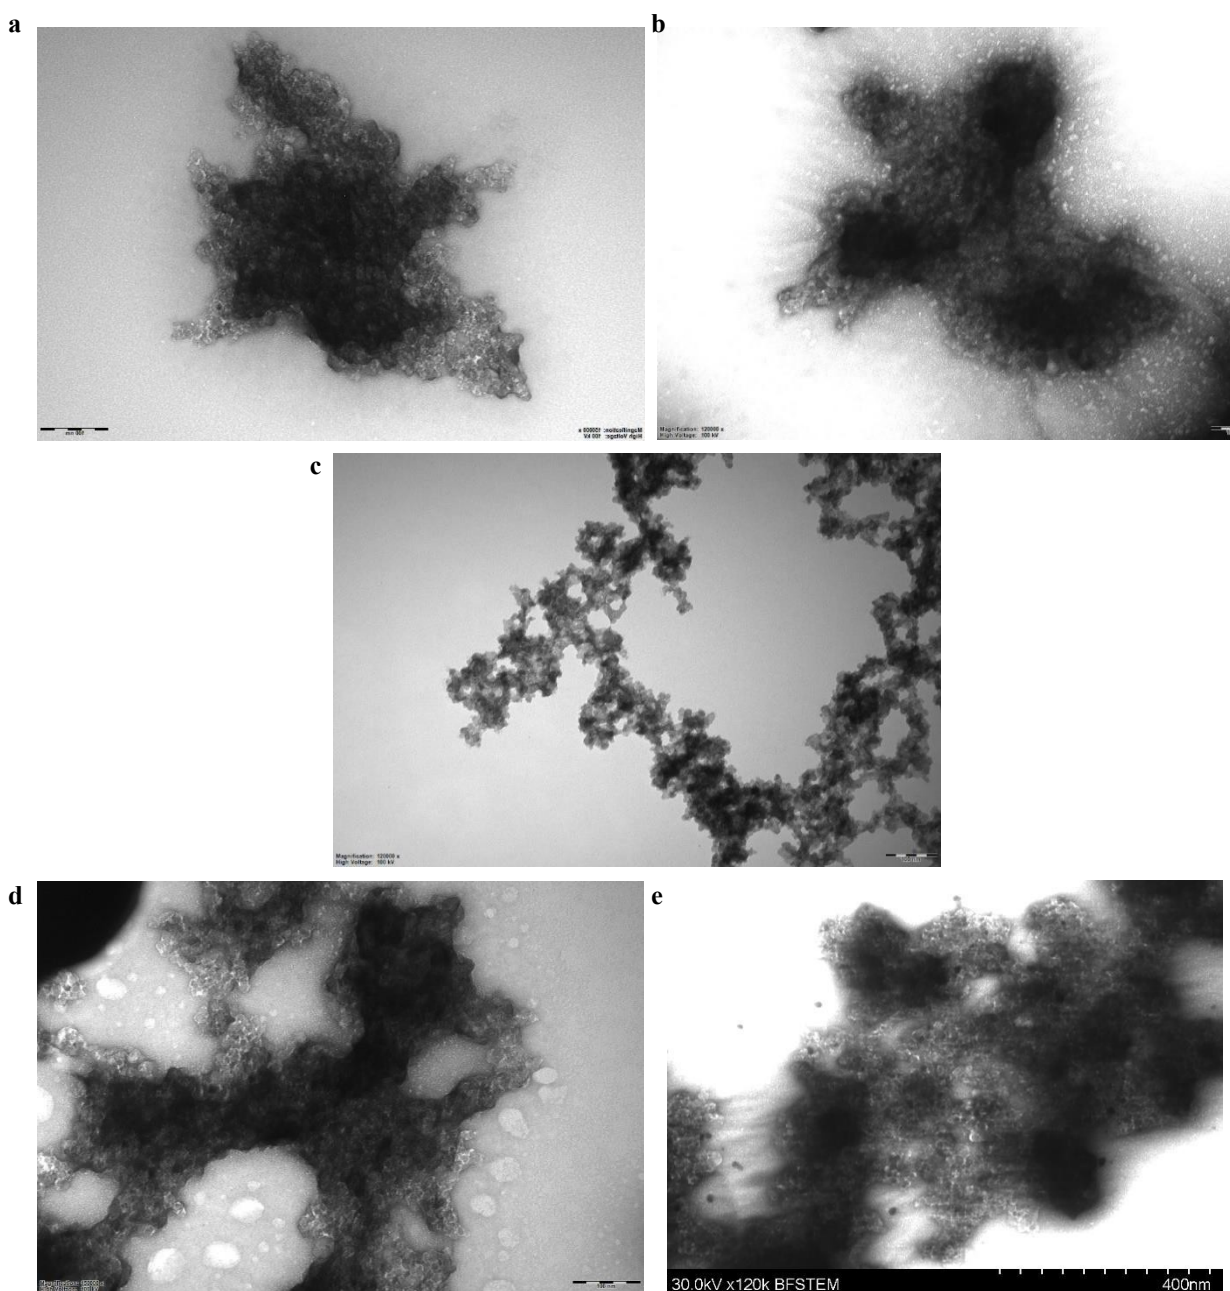

**S1.** (a-b) TEM images of bare IONPs stained with uranyl acetate. (c) TEM image of PAA-IONPs A9. (d) TEM and (e) S(T)EM images of PAA-IONPs A9 stained with uranyl acetate.

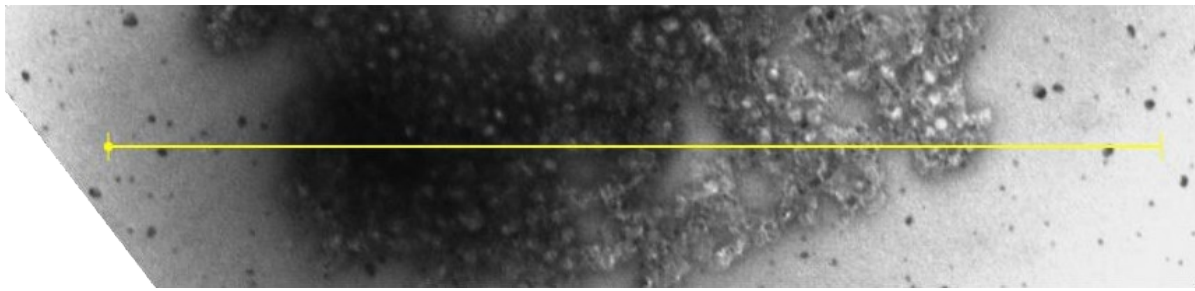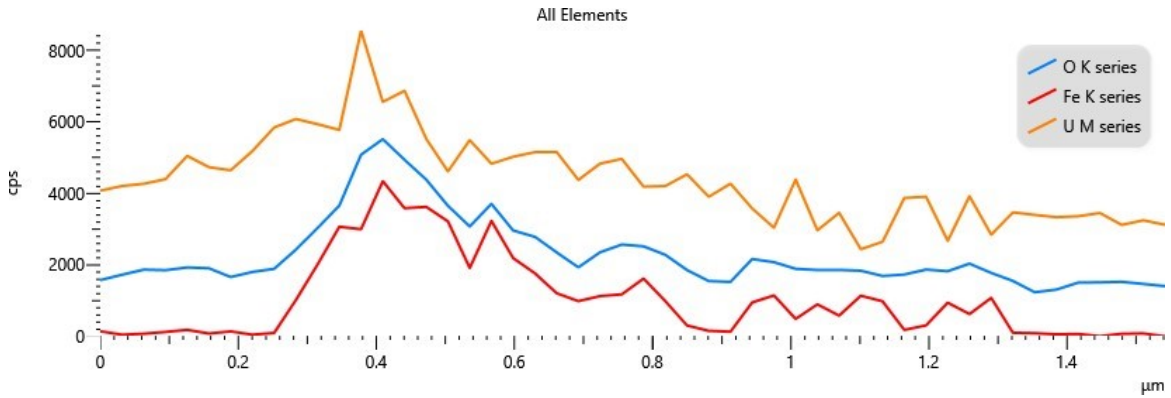

**S2.** Results of the elemental analysis done by Energy Dispersive X-ray (EDX) line scan (yellow line in STEM image) of PAA-IONPs A9 confirming the presence of uranyl stain on PAA-IONPs.

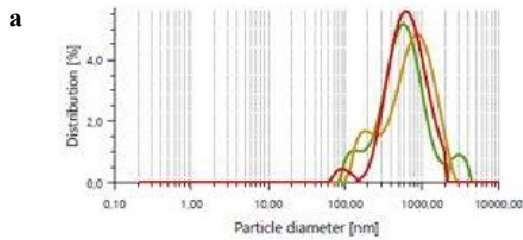

| Index | Color  | Hydrodyn. diam. [nm] | Polydisp. index [%] | Peak 1 [nm]     | Peak 2 [nm]     | Peak 3 [nm]    | Transmittance [%] |
|-------|--------|----------------------|---------------------|-----------------|-----------------|----------------|-------------------|
| 1     | Green  | 571,4                | 28,5                | 111,02 (Number) | 3193 (Number)   | 682,7 (Number) | 65,0              |
| 2     | Yellow | 631,6                | 28,9                | 144,15 (Number) | 1218,4 (Number) | - (Number)     | 63,0              |
| 3     | Red    | 661,3                | 26,8                | 82,72 (Number)  | - (Number)      | - (Number)     | 65,7              |

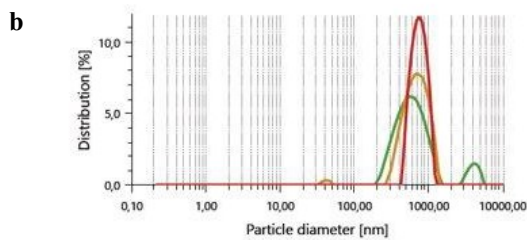

| Index | Color  | Hydrodyn. diam. [nm] | Polydisp. index [%] | Peak 1 [nm]    | Peak 2 [nm]    | Peak 3 [nm] | Transmittance [%] |
|-------|--------|----------------------|---------------------|----------------|----------------|-------------|-------------------|
| 1     | Green  | 656,3                | 23,8                | 4121 (Number)  | 614,5 (Number) | - (Number)  | 62,8              |
| 2     | Yellow | 852,6                | 26,6                | 38,96 (Number) | - (Number)     | - (Number)  | 60,0              |
| 3     | Red    | 816,7                | 12,2                | 780,2 (Number) | - (Number)     | - (Number)  | 60,1              |

**S3.** DLS measurements of A2 in (a) **1M NaCl**, 10mM Tris-HCl pH-8.0, 1mM EDTA and 0.044% Tween-20 and in (b) **2.5M NaCl**, 10mM Tris-HCl pH-8.0, 1mM EDTA and 0.044% Tween-20.

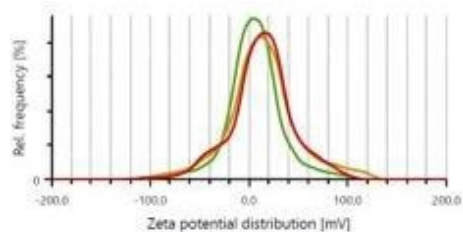

**S4.** Zeta potential measurement of A2 in 1M NaCl, 10mM Tris-HCl pH-8.0, 1mM EDTA and 0.044% Tween-20.

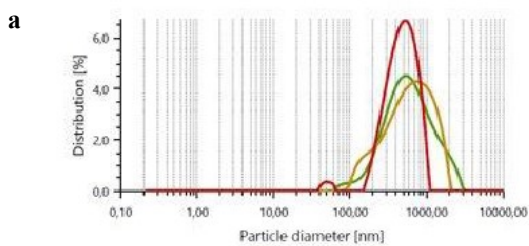

| Measurements - Number |        |                      |                     |                 |                 |                |                   |
|-----------------------|--------|----------------------|---------------------|-----------------|-----------------|----------------|-------------------|
| Index                 | Color  | Hydrodyn. diam. [nm] | Polydisp. index [%] | Peak 1 [nm]     | Peak 2 [nm]     | Peak 3 [nm]    | Transmittance [%] |
| 1                     | Green  | 508,8                | 25,6                | 82,12 (Number)  | 1683,2 (Number) | - (Number)     | 33,6              |
| 2                     | Yellow | 619,8                | 26,4                | 125,04 (Number) | 1158,1 (Number) | 372,4 (Number) | 38,7              |
| 3                     | Red    | 501,9                | 24,4                | 46,09 (Number)  | - (Number)      | - (Number)     | 41,2              |

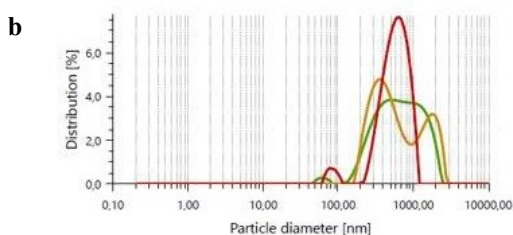

| Measurements - Number |        |                      |                     |                 |                |                |                   |
|-----------------------|--------|----------------------|---------------------|-----------------|----------------|----------------|-------------------|
| Index                 | Color  | Hydrodyn. diam. [nm] | Polydisp. index [%] | Peak 1 [nm]     | Peak 2 [nm]    | Peak 3 [nm]    | Transmittance [%] |
| 1                     | Green  | 606,5                | 27,3                | 55,89 (Number)  | - (Number)     | - (Number)     | 39,8              |
| 2                     | Yellow | 803,6                | 25,2                | 1850,2 (Number) | 205,1 (Number) | 414,1 (Number) | 41,5              |
| 3                     | Red    | 590,1                | 23,1                | 75,23 (Number)  | - (Number)     | - (Number)     | 40,0              |

**S5.** DLS measurements of A9 in (a) **1M NaCl**, 10mM Tris-HCl pH-8.0, 1mM EDTA and 0.044% Tween-20 and in (b) **2.5M NaCl**, 10mM Tris-HCl pH-8.0, 1mM EDTA and 0.044% Tween-20.

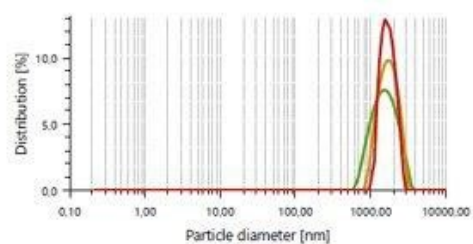

| Measurements - Number |       |                      |                     |                 |             |             |                   |
|-----------------------|-------|----------------------|---------------------|-----------------|-------------|-------------|-------------------|
| Index                 | Color | Hydrodyn. diam. [nm] | Polydisp. index [%] | Peak 1 [nm]     | Peak 2 [nm] | Peak 3 [nm] | Transmittance [%] |
| 1                     |       | 1838,1               | 21,4                | 2025 (Number)   | -(Number)   | -(Number)   | 26,5              |
| 2                     |       | 1910,4               | 25,8                | 2014 (Number)   | -(Number)   | -(Number)   | 24,7              |
| 3                     |       | 1970,6               | 10,2                | 1889,8 (Number) | -(Number)   | -(Number)   | 25,6              |

**S6.** DLS measurements of bare IONPs in **1M NaCl**, 10mM Tris-HCl pH-8.0, 1mM EDTA and 0.044% Tween-20. Sizes above  $3\mu\text{m}$  were recorded in **2.5M NaCl**, 10mM Tris-HCl pH-8.0, 1mM EDTA and 0.044% Tween-20.

| Type of Beads | Conc.   | Buffer                                                                   | Vol.beads/<br>Vol.DNA | Incubation<br>time (min) | Incubation<br>temperature | Separating<br>time (min) | Elution<br>time<br>(min) |
|---------------|---------|--------------------------------------------------------------------------|-----------------------|--------------------------|---------------------------|--------------------------|--------------------------|
| AMPure XP     | ---     | ---                                                                      | 2x                    | 8                        | RT                        | 3                        | 5                        |
| AMPure XP     | ---     | ---                                                                      | 1x                    | 8                        | RT                        | 3                        | 5                        |
| AMPure XP     | ---     | ---                                                                      | 0.6x                  | 8                        | RT                        | 3                        | 5                        |
| IONPs         | 6 mg/ml | 24% PEG 8000, 1M NaCl, 10mM Tris-HCl pH-8.0, 1mM EDTA, 0.044% Tween-20   | 2x                    | 8                        | RT                        | 3                        | 5                        |
| IONPs         | 6 mg/ml | 24% PEG 8000, 1M NaCl, 10mM Tris-HCl pH-8.0, 1mM EDTA, 0.044% Tween-20   | 1x                    | 8                        | RT                        | 3                        | 5                        |
| IONPs         | 6 mg/ml | 24% PEG 8000, 1M NaCl, 10mM Tris-HCl pH-8.0, 1mM EDTA, 0.044% Tween-20   | 0.6x                  | 8                        | RT                        | 3                        | 5                        |
| IONPs         | 6 mg/ml | 17% PEG 8000, 2.5M NaCl, 10mM Tris-HCl pH-8.0, 1mM EDTA, 0.044% Tween-20 | 2x                    | 8                        | RT                        | 3                        | 5                        |
| IONPs         | 6 mg/ml | 17% PEG 8000, 2.5M NaCl, 10mM Tris-HCl pH-8.0, 1mM EDTA, 0.044% Tween-20 | 1x                    | 8                        | RT                        | 3                        | 5                        |
| IONPs         | 6 mg/ml | 17% PEG 8000, 2.5M NaCl, 10mM Tris-HCl pH-8.0, 1mM EDTA, 0.044% Tween-20 | 0.6x                  | 8                        | RT                        | 3                        | 5                        |
| IONPs         | 3 mg/ml | 24% PEG 8000, 1M NaCl, 10mM Tris-HCl pH-8.0, 1mM EDTA, 0.044% Tween-20   | 2x                    | 8                        | RT                        | 3                        | 5                        |
| IONPs         | 3 mg/ml | 24% PEG 8000, 1M NaCl, 10mM Tris-HCl pH-8.0, 1mM EDTA, 0.044% Tween-20   | 1x                    | 8                        | RT                        | 3                        | 5                        |
| IONPs         | 3 mg/ml | 24% PEG 8000, 1M NaCl, 10mM Tris-HCl pH-8.0, 1mM EDTA, 0.044% Tween-20   | 0.6x                  | 8                        | RT                        | 3                        | 5                        |
| IONPs         | 3 mg/ml | 17% PEG 8000, 2.5M NaCl, 10mM Tris-HCl pH-8.0, 1mM EDTA, 0.044% Tween-20 | 2x                    | 8                        | RT                        | 3                        | 5                        |
| IONPs         | 3 mg/ml | 17% PEG 8000, 2.5M NaCl, 10mM Tris-HCl pH-8.0, 1mM EDTA, 0.044% Tween-20 | 1x                    | 8                        | RT                        | 3                        | 5                        |
| IONPs         | 3 mg/ml | 17% PEG 8000, 2.5M NaCl, 10mM Tris-HCl pH-8.0, 1mM EDTA, 0.044% Tween-20 | 0.6x                  | 8                        | RT                        | 3                        | 5                        |
| IONPs         | 1 mg/ml | 24% PEG 8000, 1M NaCl, 10mM Tris-HCl pH-8.0, 1mM EDTA, 0.044% Tween-20   | 2x                    | 8                        | RT                        | 3                        | 5                        |
| IONPs         | 1 mg/ml | 24% PEG 8000, 1M NaCl, 10mM Tris-HCl pH-8.0, 1mM EDTA, 0.044% Tween-20   | 1x                    | 8                        | RT                        | 3                        | 5                        |
| IONPs         | 1 mg/ml | 24% PEG 8000, 1M NaCl, 10mM Tris-HCl pH-8.0, 1mM EDTA, 0.044% Tween-20   | 0.6x                  | 8                        | RT                        | 3                        | 5                        |
| IONPs         | 1 mg/ml | 17% PEG 8000, 2.5M NaCl, 10mM Tris-HCl pH-8.0, 1mM EDTA, 0.044% Tween-20 | 2x                    | 8                        | RT                        | 3                        | 5                        |

|       |         |                                                                          |      |   |    |   |   |
|-------|---------|--------------------------------------------------------------------------|------|---|----|---|---|
| IONPs | 1 mg/ml | 17% PEG 8000, 2.5M NaCl, 10mM Tris-HCl pH-8.0, 1mM EDTA, 0.044% Tween-20 | 1x   | 8 | RT | 3 | 5 |
| IONPs | 1 mg/ml | 17% PEG 8000, 2.5M NaCl, 10mM Tris-HCl pH-8.0, 1mM EDTA, 0.044% Tween-20 | 0.6x | 8 | RT | 3 | 5 |
| A2    | 6 mg/ml | 24% PEG 8000, 1M NaCl, 10mM Tris-HCl pH-8.0, 1mM EDTA, 0.044% Tween-20   | 2x   | 8 | RT | 3 | 5 |
| A2    | 6 mg/ml | 24% PEG 8000, 1M NaCl, 10mM Tris-HCl pH-8.0, 1mM EDTA, 0.044% Tween-20   | 1x   | 8 | RT | 3 | 5 |
| A2    | 6 mg/ml | 24% PEG 8000, 1M NaCl, 10mM Tris-HCl pH-8.0, 1mM EDTA, 0.044% Tween-20   | 0.6x | 8 | RT | 3 | 5 |
| A2    | 6 mg/ml | 17% PEG 8000, 2.5M NaCl, 10mM Tris-HCl pH-8.0, 1mM EDTA, 0.044% Tween-20 | 2x   | 8 | RT | 3 | 5 |
| A2    | 6 mg/ml | 17% PEG 8000, 2.5M NaCl, 10mM Tris-HCl pH-8.0, 1mM EDTA, 0.044% Tween-20 | 1x   | 8 | RT | 3 | 5 |
| A2    | 6 mg/ml | 17% PEG 8000, 2.5M NaCl, 10mM Tris-HCl pH-8.0, 1mM EDTA, 0.044% Tween-20 | 0.6x | 8 | RT | 3 | 5 |
| A2    | 3 mg/ml | 24% PEG 8000, 1M NaCl, 10mM Tris-HCl pH-8.0, 1mM EDTA, 0.044% Tween-20   | 2x   | 8 | RT | 3 | 5 |
| A2    | 3 mg/ml | 24% PEG 8000, 1M NaCl, 10mM Tris-HCl pH-8.0, 1mM EDTA, 0.044% Tween-20   | 1x   | 8 | RT | 3 | 5 |
| A2    | 3 mg/ml | 24% PEG 8000, 1M NaCl, 10mM Tris-HCl pH-8.0, 1mM EDTA, 0.044% Tween-20   | 0.6x | 8 | RT | 3 | 5 |
| A2    | 3 mg/ml | 17% PEG 8000, 2.5M NaCl, 10mM Tris-HCl pH-8.0, 1mM EDTA, 0.044% Tween-20 | 2x   | 8 | RT | 3 | 5 |
| A2    | 3 mg/ml | 17% PEG 8000, 2.5M NaCl, 10mM Tris-HCl pH-8.0, 1mM EDTA, 0.044% Tween-20 | 1x   | 8 | RT | 3 | 5 |
| A2    | 3 mg/ml | 17% PEG 8000, 2.5M NaCl, 10mM Tris-HCl pH-8.0, 1mM EDTA, 0.044% Tween-20 | 0.6x | 8 | RT | 3 | 5 |
| A2    | 1 mg/ml | 24% PEG 8000, 1M NaCl, 10mM Tris-HCl pH-8.0, 1mM EDTA, 0.044% Tween-20   | 2x   | 8 | RT | 3 | 5 |
| A2    | 1 mg/ml | 24% PEG 8000, 1M NaCl, 10mM Tris-HCl pH-8.0, 1mM EDTA, 0.044% Tween-20   | 1x   | 8 | RT | 3 | 5 |
| A2    | 1 mg/ml | 24% PEG 8000, 1M NaCl, 10mM Tris-HCl pH-8.0, 1mM EDTA, 0.044% Tween-20   | 0.6x | 8 | RT | 3 | 5 |
| A2    | 1 mg/ml | 17% PEG 8000, 2.5M NaCl, 10mM Tris-HCl pH-8.0, 1mM EDTA, 0.044% Tween-20 | 2x   | 8 | RT | 3 | 5 |
| A2    | 1 mg/ml | 17% PEG 8000, 2.5M NaCl, 10mM Tris-HCl pH-8.0, 1mM EDTA, 0.044% Tween-20 | 1x   | 8 | RT | 3 | 5 |
| A2    | 1 mg/ml | 17% PEG 8000, 2.5M NaCl, 10mM Tris-HCl pH-8.0, 1mM EDTA, 0.044% Tween-20 | 0.6x | 8 | RT | 3 | 5 |

|     |         |                                                                          |      |   |    |   |   |
|-----|---------|--------------------------------------------------------------------------|------|---|----|---|---|
| A9  | 6 mg/ml | 24% PEG 8000, 1M NaCl, 10mM Tris-HCl pH-8.0, 1mM EDTA, 0.044% Tween-20   | 2x   | 8 | RT | 3 | 5 |
| A9  | 6 mg/ml | 24% PEG 8000, 1M NaCl, 10mM Tris-HCl pH-8.0, 1mM EDTA, 0.044% Tween-20   | 1x   | 8 | RT | 3 | 5 |
| A9  | 6 mg/ml | 24% PEG 8000, 1M NaCl, 10mM Tris-HCl pH-8.0, 1mM EDTA, 0.044% Tween-20   | 0.6x | 8 | RT | 3 | 5 |
| A9  | 6 mg/ml | 17% PEG 8000, 2.5M NaCl, 10mM Tris-HCl pH-8.0, 1mM EDTA, 0.044% Tween-20 | 2x   | 8 | RT | 3 | 5 |
| A9  | 6 mg/ml | 17% PEG 8000, 2.5M NaCl, 10mM Tris-HCl pH-8.0, 1mM EDTA, 0.044% Tween-20 | 1x   | 8 | RT | 3 | 5 |
| A9  | 6 mg/ml | 17% PEG 8000, 2.5M NaCl, 10mM Tris-HCl pH-8.0, 1mM EDTA, 0.044% Tween-20 | 0.6x | 8 | RT | 3 | 5 |
| A9  | 3 mg/ml | 24% PEG 8000, 1M NaCl, 10mM Tris-HCl pH-8.0, 1mM EDTA, 0.044% Tween-20   | 2x   | 8 | RT | 3 | 5 |
| A9  | 3 mg/ml | 24% PEG 8000, 1M NaCl, 10mM Tris-HCl pH-8.0, 1mM EDTA, 0.044% Tween-20   | 1x   | 8 | RT | 3 | 5 |
| A9  | 3 mg/ml | 24% PEG 8000, 1M NaCl, 10mM Tris-HCl pH-8.0, 1mM EDTA, 0.044% Tween-20   | 0.6x | 8 | RT | 3 | 5 |
| A9  | 3 mg/ml | 17% PEG 8000, 2.5M NaCl, 10mM Tris-HCl pH-8.0, 1mM EDTA, 0.044% Tween-20 | 2x   | 8 | RT | 3 | 5 |
| A9  | 3 mg/ml | 17% PEG 8000, 2.5M NaCl, 10mM Tris-HCl pH-8.0, 1mM EDTA, 0.044% Tween-20 | 1x   | 8 | RT | 3 | 5 |
| A9  | 3 mg/ml | 17% PEG 8000, 2.5M NaCl, 10mM Tris-HCl pH-8.0, 1mM EDTA, 0.044% Tween-20 | 0.6x | 8 | RT | 3 | 5 |
| A9  | 1 mg/ml | 24% PEG 8000, 1M NaCl, 10mM Tris-HCl pH-8.0, 1mM EDTA, 0.044% Tween-20   | 2x   | 8 | RT | 3 | 5 |
| A9  | 1 mg/ml | 24% PEG 8000, 1M NaCl, 10mM Tris-HCl pH-8.0, 1mM EDTA, 0.044% Tween-20   | 1x   | 8 | RT | 3 | 5 |
| A9  | 1 mg/ml | 24% PEG 8000, 1M NaCl, 10mM Tris-HCl pH-8.0, 1mM EDTA, 0.044% Tween-20   | 0.6x | 8 | RT | 3 | 5 |
| A9  | 1 mg/ml | 17% PEG 8000, 2.5M NaCl, 10mM Tris-HCl pH-8.0, 1mM EDTA, 0.044% Tween-20 | 2x   | 8 | RT | 3 | 5 |
| A9  | 1 mg/ml | 17% PEG 8000, 2.5M NaCl, 10mM Tris-HCl pH-8.0, 1mM EDTA, 0.044% Tween-20 | 1x   | 8 | RT | 3 | 5 |
| A9  | 1 mg/ml | 17% PEG 8000, 2.5M NaCl, 10mM Tris-HCl pH-8.0, 1mM EDTA, 0.044% Tween-20 | 0.6x | 8 | RT | 3 | 5 |
| A10 | 6 mg/ml | 24% PEG 8000, 1M NaCl, 10mM Tris-HCl pH-8.0, 1mM EDTA, 0.044% Tween-20   | 2x   | 8 | RT | 3 | 5 |
| A10 | 6 mg/ml | 24% PEG 8000, 1M NaCl, 10mM Tris-HCl pH-8.0, 1mM EDTA, 0.044% Tween-20   | 1x   | 8 | RT | 3 | 5 |

|     |         |                                                                          |      |   |    |   |   |
|-----|---------|--------------------------------------------------------------------------|------|---|----|---|---|
| A10 | 6 mg/ml | 24% PEG 8000, 1M NaCl, 10mM Tris-HCl pH-8.0, 1mM EDTA, 0.044% Tween-20   | 0.6x | 8 | RT | 3 | 5 |
| A10 | 6 mg/ml | 17% PEG 8000, 2.5M NaCl, 10mM Tris-HCl pH-8.0, 1mM EDTA, 0.044% Tween-20 | 2x   | 8 | RT | 3 | 5 |
| A10 | 6 mg/ml | 17% PEG 8000, 2.5M NaCl, 10mM Tris-HCl pH-8.0, 1mM EDTA, 0.044% Tween-20 | 1x   | 8 | RT | 3 | 5 |
| A10 | 6 mg/ml | 17% PEG 8000, 2.5M NaCl, 10mM Tris-HCl pH-8.0, 1mM EDTA, 0.044% Tween-20 | 0.6x | 8 | RT | 3 | 5 |
| A10 | 3 mg/ml | 24% PEG 8000, 1M NaCl, 10mM Tris-HCl pH-8.0, 1mM EDTA, 0.044% Tween-20   | 2x   | 8 | RT | 3 | 5 |
| A10 | 3 mg/ml | 24% PEG 8000, 1M NaCl, 10mM Tris-HCl pH-8.0, 1mM EDTA, 0.044% Tween-20   | 1x   | 8 | RT | 3 | 5 |
| A10 | 3 mg/ml | 24% PEG 8000, 1M NaCl, 10mM Tris-HCl pH-8.0, 1mM EDTA, 0.044% Tween-20   | 0.6x | 8 | RT | 3 | 5 |
| A10 | 3 mg/ml | 17% PEG 8000, 2.5M NaCl, 10mM Tris-HCl pH-8.0, 1mM EDTA, 0.044% Tween-20 | 2x   | 8 | RT | 3 | 5 |
| A10 | 3 mg/ml | 17% PEG 8000, 2.5M NaCl, 10mM Tris-HCl pH-8.0, 1mM EDTA, 0.044% Tween-20 | 1x   | 8 | RT | 3 | 5 |
| A10 | 3 mg/ml | 17% PEG 8000, 2.5M NaCl, 10mM Tris-HCl pH-8.0, 1mM EDTA, 0.044% Tween-20 | 0.6x | 8 | RT | 3 | 5 |
| A10 | 1 mg/ml | 24% PEG 8000, 1M NaCl, 10mM Tris-HCl pH-8.0, 1mM EDTA, 0.044% Tween-20   | 2x   | 8 | RT | 3 | 5 |
| A10 | 1 mg/ml | 24% PEG 8000, 1M NaCl, 10mM Tris-HCl pH-8.0, 1mM EDTA, 0.044% Tween-20   | 1x   | 8 | RT | 3 | 5 |
| A10 | 1 mg/ml | 24% PEG 8000, 1M NaCl, 10mM Tris-HCl pH-8.0, 1mM EDTA, 0.044% Tween-20   | 0.6x | 8 | RT | 3 | 5 |
| A10 | 1 mg/ml | 17% PEG 8000, 2.5M NaCl, 10mM Tris-HCl pH-8.0, 1mM EDTA, 0.044% Tween-20 | 2x   | 8 | RT | 3 | 5 |
| A10 | 1 mg/ml | 17% PEG 8000, 2.5M NaCl, 10mM Tris-HCl pH-8.0, 1mM EDTA, 0.044% Tween-20 | 1x   | 8 | RT | 3 | 5 |
| A10 | 1 mg/ml | 17% PEG 8000, 2.5M NaCl, 10mM Tris-HCl pH-8.0, 1mM EDTA, 0.044% Tween-20 | 0.6x | 8 | RT | 3 | 5 |

S7. Table 1 of conditions tested.



| Type of Beads | Concentration | Buffer                                                                   | Vol.beads/<br>Vol.DNA | % Recovery<br>Mean | % SD | Range       |
|---------------|---------------|--------------------------------------------------------------------------|-----------------------|--------------------|------|-------------|
| AMPure XP     | ---           | ---                                                                      | 2x                    | 95                 | 2    | 100 bp-4kbp |
| AMPure XP     | ---           | ---                                                                      | 1x                    | 83                 | 2    | 100 bp-4kbp |
| AMPure XP     | ---           | ---                                                                      | 0.6x                  | 71                 | 2    | 100 bp-4kbp |
| IONPs         | 6 mg/ml       | 24% PEG 8000, 1M NaCl, 10mM Tris-HCl pH-8.0, 1mM EDTA, 0.044% Tween-20   | 2x                    | 0                  | 0    | 100 bp-4kbp |
| IONPs         | 6 mg/ml       | 24% PEG 8000, 1M NaCl, 10mM Tris-HCl pH-8.0, 1mM EDTA, 0.044% Tween-20   | 1x                    | 0                  | 0    | 100 bp-4kbp |
| IONPs         | 6 mg/ml       | 24% PEG 8000, 1M NaCl, 10mM Tris-HCl pH-8.0, 1mM EDTA, 0.044% Tween-20   | 0.6x                  | 0                  | 0    | 100 bp-4kbp |
| IONPs         | 6 mg/ml       | 17% PEG 8000, 2.5M NaCl, 10mM Tris-HCl pH-8.0, 1mM EDTA, 0.044% Tween-20 | 2x                    | 0                  | 0    | 100 bp-4kbp |
| IONPs         | 6 mg/ml       | 17% PEG 8000, 2.5M NaCl, 10mM Tris-HCl pH-8.0, 1mM EDTA, 0.044% Tween-20 | 1x                    | 0                  | 0    | 100 bp-4kbp |
| IONPs         | 6 mg/ml       | 17% PEG 8000, 2.5M NaCl, 10mM Tris-HCl pH-8.0, 1mM EDTA, 0.044% Tween-20 | 0.6x                  | 0                  | 0    | 100 bp-4kbp |
| IONPs         | 3 mg/ml       | 24% PEG 8000, 1M NaCl, 10mM Tris-HCl pH-8.0, 1mM EDTA, 0.044% Tween-20   | 2x                    | 0                  | 0    | 100 bp-4kbp |
| IONPs         | 3 mg/ml       | 24% PEG 8000, 1M NaCl, 10mM Tris-HCl pH-8.0, 1mM EDTA, 0.044% Tween-20   | 1x                    | 0                  | 0    | 100 bp-4kbp |
| IONPs         | 3 mg/ml       | 24% PEG 8000, 1M NaCl, 10mM Tris-HCl pH-8.0, 1mM EDTA, 0.044% Tween-20   | 0.6x                  | 0                  | 0    | 100 bp-4kbp |
| IONPs         | 3 mg/ml       | 17% PEG 8000, 2.5M NaCl, 10mM Tris-HCl pH-8.0, 1mM EDTA, 0.044% Tween-20 | 2x                    | 0                  | 0    | 100 bp-4kbp |
| IONPs         | 3 mg/ml       | 17% PEG 8000, 2.5M NaCl, 10mM Tris-HCl pH-8.0, 1mM EDTA, 0.044% Tween-20 | 1x                    | 0                  | 0    | 100 bp-4kbp |
| IONPs         | 3 mg/ml       | 17% PEG 8000, 2.5M NaCl, 10mM Tris-HCl pH-8.0, 1mM EDTA, 0.044% Tween-20 | 0.6x                  | 0                  | 0    | 100 bp-4kbp |
| IONPs         | 1 mg/ml       | 24% PEG 8000, 1M NaCl, 10mM Tris-HCl pH-8.0, 1mM EDTA, 0.044% Tween-20   | 2x                    | 0                  | 0    | 100 bp-4kbp |
| IONPs         | 1 mg/ml       | 24% PEG 8000, 1M NaCl, 10mM Tris-HCl pH-8.0, 1mM EDTA, 0.044% Tween-20   | 1x                    | 0                  | 0    | 100 bp-4kbp |
| IONPs         | 1 mg/ml       | 24% PEG 8000, 1M NaCl, 10mM Tris-HCl pH-8.0, 1mM EDTA, 0.044% Tween-20   | 0.6x                  | 0                  | 0    | 100 bp-4kbp |
| IONPs         | 1 mg/ml       | 17% PEG 8000, 2.5M NaCl, 10mM Tris-HCl pH-8.0, 1mM EDTA, 0.044% Tween-20 | 2x                    | 0                  | 0    | 100 bp-4kbp |
| IONPs         | 1 mg/ml       | 17% PEG 8000, 2.5M NaCl, 10mM Tris-HCl pH-8.0, 1mM EDTA, 0.044% Tween-20 | 1x                    | 0                  | 0    | 100 bp-4kbp |
| IONPs         | 1 mg/ml       | 17% PEG 8000, 2.5M NaCl, 10mM Tris-HCl pH-8.0, 1mM EDTA, 0.044% Tween-20 | 0.6x                  | 0                  | 0    | 100 bp-4kbp |
| A2            | 6 mg/ml       | 24% PEG 8000, 1M NaCl, 10mM Tris-HCl pH-8.0, 1mM EDTA, 0.044% Tween-20   | 2x                    | 93                 | 2    | 100 bp-4kbp |
| A2            | 6 mg/ml       | 24% PEG 8000, 1M NaCl, 10mM Tris-HCl pH-8.0, 1mM EDTA, 0.044% Tween-20   | 1x                    | 82                 | 2    | 100 bp-4kbp |
| A2            | 6 mg/ml       | 24% PEG 8000, 1M NaCl, 10mM Tris-HCl pH-8.0, 1mM EDTA, 0.044% Tween-20   | 0.6x                  | 70                 | 2    | 100 bp-4kbp |
| A2            | 6 mg/ml       | 17% PEG 8000, 2.5M NaCl, 10mM Tris-HCl pH-8.0, 1mM EDTA, 0.044% Tween-20 | 2x                    | 91                 | 2    | 100 bp-4kbp |
| A2            | 6 mg/ml       | 17% PEG 8000, 2.5M NaCl, 10mM Tris-HCl pH-8.0, 1mM EDTA, 0.044% Tween-20 | 1x                    | 79                 | 2    | 100 bp-4kbp |
| A2            | 6 mg/ml       | 17% PEG 8000, 2.5M NaCl, 10mM Tris-HCl pH-8.0, 1mM EDTA, 0.044% Tween-20 | 0.6x                  | 55                 | 2    | 100 bp-4kbp |
| A2            | 3 mg/ml       | 24% PEG 8000, 1M NaCl, 10mM Tris-HCl pH-8.0, 1mM EDTA, 0.044% Tween-20   | 2x                    | 94                 | 2    | 100 bp-4kbp |

|     |         |                                                                          |      |    |     |             |
|-----|---------|--------------------------------------------------------------------------|------|----|-----|-------------|
| A2  | 3 mg/ml | 24% PEG 8000, 1M NaCl, 10mM Tris-HCl pH-8.0, 1mM EDTA, 0.044% Tween-20   | 1x   | 81 | 2   | 100 bp-4kbp |
| A2  | 3 mg/ml | 24% PEG 8000, 1M NaCl, 10mM Tris-HCl pH-8.0, 1mM EDTA, 0.044% Tween-20   | 0.6x | 68 | 2   | 100 bp-4kbp |
| A2  | 3 mg/ml | 17% PEG 8000, 2.5M NaCl, 10mM Tris-HCl pH-8.0, 1mM EDTA, 0.044% Tween-20 | 2x   | 88 | 2   | 100 bp-4kbp |
| A2  | 3 mg/ml | 17% PEG 8000, 2.5M NaCl, 10mM Tris-HCl pH-8.0, 1mM EDTA, 0.044% Tween-20 | 1x   | 76 | 2   | 100 bp-4kbp |
| A2  | 3 mg/ml | 17% PEG 8000, 2.5M NaCl, 10mM Tris-HCl pH-8.0, 1mM EDTA, 0.044% Tween-20 | 0.6x | 54 | 2   | 100 bp-4kbp |
| A2  | 1 mg/ml | 24% PEG 8000, 1M NaCl, 10mM Tris-HCl pH-8.0, 1mM EDTA, 0.044% Tween-20   | 2x   | 82 | 2   | 100 bp-4kbp |
| A2  | 1 mg/ml | 24% PEG 8000, 1M NaCl, 10mM Tris-HCl pH-8.0, 1mM EDTA, 0.044% Tween-20   | 1x   | 71 | 2   | 100 bp-4kbp |
| A2  | 1 mg/ml | 24% PEG 8000, 1M NaCl, 10mM Tris-HCl pH-8.0, 1mM EDTA, 0.044% Tween-20   | 0.6x | 49 | 2   | 100 bp-4kbp |
| A2  | 1 mg/ml | 17% PEG 8000, 2.5M NaCl, 10mM Tris-HCl pH-8.0, 1mM EDTA, 0.044% Tween-20 | 2x   | 77 | 2   | 100 bp-4kbp |
| A2  | 1 mg/ml | 17% PEG 8000, 2.5M NaCl, 10mM Tris-HCl pH-8.0, 1mM EDTA, 0.044% Tween-20 | 1x   | 60 | 2   | 100 bp-4kbp |
| A2  | 1 mg/ml | 17% PEG 8000, 2.5M NaCl, 10mM Tris-HCl pH-8.0, 1mM EDTA, 0.044% Tween-20 | 0.6x | 42 | 2   | 100 bp-4kbp |
| A9  | 6 mg/ml | 24% PEG 8000, 1M NaCl, 10mM Tris-HCl pH-8.0, 1mM EDTA, 0.044% Tween-20   | 2x   | 96 | 1.5 | 100 bp-4kbp |
| A9  | 6 mg/ml | 24% PEG 8000, 1M NaCl, 10mM Tris-HCl pH-8.0, 1mM EDTA, 0.044% Tween-20   | 1x   | 85 | 1.5 | 100 bp-4kbp |
| A9  | 6 mg/ml | 24% PEG 8000, 1M NaCl, 10mM Tris-HCl pH-8.0, 1mM EDTA, 0.044% Tween-20   | 0.6x | 75 | 1.5 | 100 bp-4kbp |
| A9  | 6 mg/ml | 17% PEG 8000, 2.5M NaCl, 10mM Tris-HCl pH-8.0, 1mM EDTA, 0.044% Tween-20 | 2x   | 94 | 1.5 | 100 bp-4kbp |
| A9  | 6 mg/ml | 17% PEG 8000, 2.5M NaCl, 10mM Tris-HCl pH-8.0, 1mM EDTA, 0.044% Tween-20 | 1x   | 86 | 1.5 | 100 bp-4kbp |
| A9  | 6 mg/ml | 17% PEG 8000, 2.5M NaCl, 10mM Tris-HCl pH-8.0, 1mM EDTA, 0.044% Tween-20 | 0.6x | 72 | 1.5 | 100 bp-4kbp |
| A9  | 3 mg/ml | 24% PEG 8000, 1M NaCl, 10mM Tris-HCl pH-8.0, 1mM EDTA, 0.044% Tween-20   | 2x   | 95 | 1.5 | 100 bp-4kbp |
| A9  | 3 mg/ml | 24% PEG 8000, 1M NaCl, 10mM Tris-HCl pH-8.0, 1mM EDTA, 0.044% Tween-20   | 1x   | 84 | 1.5 | 100 bp-4kbp |
| A9  | 3 mg/ml | 24% PEG 8000, 1M NaCl, 10mM Tris-HCl pH-8.0, 1mM EDTA, 0.044% Tween-20   | 0.6x | 72 | 1.5 | 100 bp-4kbp |
| A9  | 3 mg/ml | 17% PEG 8000, 2.5M NaCl, 10mM Tris-HCl pH-8.0, 1mM EDTA, 0.044% Tween-20 | 2x   | 95 | 1.5 | 100 bp-4kbp |
| A9  | 3 mg/ml | 17% PEG 8000, 2.5M NaCl, 10mM Tris-HCl pH-8.0, 1mM EDTA, 0.044% Tween-20 | 1x   | 83 | 1.5 | 100 bp-4kbp |
| A9  | 3 mg/ml | 17% PEG 8000, 2.5M NaCl, 10mM Tris-HCl pH-8.0, 1mM EDTA, 0.044% Tween-20 | 0.6x | 71 | 1.5 | 100 bp-4kbp |
| A9  | 1 mg/ml | 24% PEG 8000, 1M NaCl, 10mM Tris-HCl pH-8.0, 1mM EDTA, 0.044% Tween-20   | 2x   | 88 | 1.5 | 100 bp-4kbp |
| A9  | 1 mg/ml | 24% PEG 8000, 1M NaCl, 10mM Tris-HCl pH-8.0, 1mM EDTA, 0.044% Tween-20   | 1x   | 79 | 1.5 | 100 bp-4kbp |
| A9  | 1 mg/ml | 24% PEG 8000, 1M NaCl, 10mM Tris-HCl pH-8.0, 1mM EDTA, 0.044% Tween-20   | 0.6x | 66 | 1.5 | 100 bp-4kbp |
| A9  | 1 mg/ml | 17% PEG 8000, 2.5M NaCl, 10mM Tris-HCl pH-8.0, 1mM EDTA, 0.044% Tween-20 | 2x   | 87 | 1.5 | 100 bp-4kbp |
| A9  | 1 mg/ml | 17% PEG 8000, 2.5M NaCl, 10mM Tris-HCl pH-8.0, 1mM EDTA, 0.044% Tween-20 | 1x   | 80 | 1.5 | 100 bp-4kbp |
| A9  | 1 mg/ml | 17% PEG 8000, 2.5M NaCl, 10mM Tris-HCl pH-8.0, 1mM EDTA, 0.044% Tween-20 | 0.6x | 68 | 1.5 | 100 bp-4kbp |
| A10 | 6 mg/ml | 24% PEG 8000, 1M NaCl, 10mM Tris-HCl pH-8.0, 1mM EDTA, 0.044% Tween-20   | 2x   | 97 | 0.5 | 100 bp-4kbp |
| A10 | 6 mg/ml | 24% PEG 8000, 1M NaCl, 10mM Tris-HCl pH-8.0, 1mM EDTA, 0.044% Tween-20   | 1x   | 86 | 0.5 | 100 bp-4kbp |
| A10 | 6 mg/ml | 24% PEG 8000, 1M NaCl, 10mM Tris-HCl pH-8.0, 1mM EDTA, 0.044% Tween-20   | 0.6x | 76 | 0.5 | 100 bp-4kbp |
| A10 | 6 mg/ml | 17% PEG 8000, 2.5M NaCl, 10mM Tris-HCl pH-8.0, 1mM EDTA, 0.044% Tween-20 | 2x   | 98 | 0.5 | 100 bp-4kbp |

|     |         |                                                                          |      |    |     |             |
|-----|---------|--------------------------------------------------------------------------|------|----|-----|-------------|
| A10 | 6 mg/ml | 17% PEG 8000, 2.5M NaCl, 10mM Tris-HCl pH-8.0, 1mM EDTA, 0.044% Tween-20 | 1x   | 85 | 0.5 | 100 bp-4kbp |
| A10 | 6 mg/ml | 17% PEG 8000, 2.5M NaCl, 10mM Tris-HCl pH-8.0, 1mM EDTA, 0.044% Tween-20 | 0.6x | 73 | 0.5 | 100 bp-4kbp |
| A10 | 3 mg/ml | 24% PEG 8000, 1M NaCl, 10mM Tris-HCl pH-8.0, 1mM EDTA, 0.044% Tween-20   | 2x   | 98 | 0.5 | 100 bp-4kbp |
| A10 | 3 mg/ml | 24% PEG 8000, 1M NaCl, 10mM Tris-HCl pH-8.0, 1mM EDTA, 0.044% Tween-20   | 1x   | 85 | 0.5 | 100 bp-4kbp |
| A10 | 3 mg/ml | 24% PEG 8000, 1M NaCl, 10mM Tris-HCl pH-8.0, 1mM EDTA, 0.044% Tween-20   | 0.6x | 72 | 0.5 | 100 bp-4kbp |
| A10 | 3 mg/ml | 17% PEG 8000, 2.5M NaCl, 10mM Tris-HCl pH-8.0, 1mM EDTA, 0.044% Tween-20 | 2x   | 97 | 0.5 | 100 bp-4kbp |
| A10 | 3 mg/ml | 17% PEG 8000, 2.5M NaCl, 10mM Tris-HCl pH-8.0, 1mM EDTA, 0.044% Tween-20 | 1x   | 87 | 0.5 | 100 bp-4kbp |
| A10 | 3 mg/ml | 17% PEG 8000, 2.5M NaCl, 10mM Tris-HCl pH-8.0, 1mM EDTA, 0.044% Tween-20 | 0.6x | 71 | 0.5 | 100 bp-4kbp |
| A10 | 1 mg/ml | 24% PEG 8000, 1M NaCl, 10mM Tris-HCl pH-8.0, 1mM EDTA, 0.044% Tween-20   | 2x   | 92 | 0.5 | 100 bp-4kbp |
| A10 | 1 mg/ml | 24% PEG 8000, 1M NaCl, 10mM Tris-HCl pH-8.0, 1mM EDTA, 0.044% Tween-20   | 1x   | 83 | 0.5 | 100 bp-4kbp |
| A10 | 1 mg/ml | 24% PEG 8000, 1M NaCl, 10mM Tris-HCl pH-8.0, 1mM EDTA, 0.044% Tween-20   | 0.6x | 67 | 0.5 | 100 bp-4kbp |
| A10 | 1 mg/ml | 17% PEG 8000, 2.5M NaCl, 10mM Tris-HCl pH-8.0, 1mM EDTA, 0.044% Tween-20 | 2x   | 90 | 0.5 | 100 bp-4kbp |
| A10 | 1 mg/ml | 17% PEG 8000, 2.5M NaCl, 10mM Tris-HCl pH-8.0, 1mM EDTA, 0.044% Tween-20 | 1x   | 86 | 0.5 | 100 bp-4kbp |
| A10 | 1 mg/ml | 17% PEG 8000, 2.5M NaCl, 10mM Tris-HCl pH-8.0, 1mM EDTA, 0.044% Tween-20 | 0.6x | 70 | 0.5 | 100 bp-4kbp |

**S8.** Table 2 of performance comparison for size selection.
